# Supplementary material
Source: HighWire-hosted journal article supplement (https://bmjopen.bmj.com/content/14/7/e084356)
Supplement: inline-supplementary-material-1 [file inline-supplementary-material-1.pdf]

SUPPLEMENTARY INFORMATION

Supplementary Table 1: Results from PMR report

| Input parameter                                            |                                                                |                                                                  | Input value   |
|------------------------------------------------------------|----------------------------------------------------------------|------------------------------------------------------------------|---------------|
| Cost inputs                                                | Infrastructure costs for BaS scale-up (small scale facilities) | Facility capacity (number of BaS per year)                       | 150.00        |
|                                                            |                                                                | Cost of setting up a facility                                    | £2,500,000.00 |
|                                                            |                                                                | Time required for setting up a facility (in years)               | 1.00          |
|                                                            |                                                                | Time required for the facility to be fully functional (in years) | 0.00          |
|                                                            | Infrastructure costs for BaS scale-up (large scale facilities) | Facility capacity (number of BaS per year)                       | 500.00        |
|                                                            |                                                                | Cost of setting up a facility                                    | £7,500,000.00 |
|                                                            |                                                                | Time required for setting up a facility (in years)               | 3.00          |
|                                                            |                                                                | Time required for the facility to be fully functional (in years) | 0.00          |
|                                                            |                                                                | Number of BaS per year (facility capacity)                       | 500.00        |
|                                                            | Capacity inputs                                                | Current annual capacity (number of BaS)                          | NHS           |
| Private sector                                             |                                                                |                                                                  | 15,000        |
| Maximum potential annual capacity                          |                                                                | NHS                                                              | 7,888         |
|                                                            |                                                                | Private sector                                                   | 18,750        |
| BaS distribution by procedure type (for scale-up strategy) |                                                                | Gastric band                                                     | 0.00%         |
|                                                            |                                                                | Sleeve gastrectomy                                               | 50.00%        |
|                                                            |                                                                | Gastric bypass                                                   | 50.00%        |
| Eligibility assessment stage                               | Number of personnel visits                                     | GP                                                               | 1.00          |
|                                                            |                                                                | Psychologist                                                     | 1.50          |
|                                                            |                                                                | Dietitian                                                        | 1.00          |
|                                                            |                                                                | Endocrinologist                                                  | 1.00          |
|                                                            |                                                                | Physiotherapist                                                  | 1.00          |
|                                                            | Personnel time per visit (in mins)                             | GP                                                               | 30.00         |
|                                                            |                                                                | Psychologist                                                     | 60.00         |
|                                                            |                                                                | Dietitian                                                        | 30.00         |
|                                                            |                                                                | Endocrinologist                                                  | 30.00         |
|                                                            |                                                                | Physiotherapist                                                  | 45.00         |

|                             |                                                                              |                                                                                                                                                                                                                                        |            |
|-----------------------------|------------------------------------------------------------------------------|----------------------------------------------------------------------------------------------------------------------------------------------------------------------------------------------------------------------------------------|------------|
|                             | Proportion of population requiring personnel visits/monitoring               | GP                                                                                                                                                                                                                                     | 100.00%    |
|                             |                                                                              | Psychologist                                                                                                                                                                                                                           | 100.00%    |
|                             |                                                                              | Dietitian                                                                                                                                                                                                                              | 100.00%    |
|                             |                                                                              | Endocrinologist                                                                                                                                                                                                                        | 80.00%     |
|                             |                                                                              | Physiotherapist                                                                                                                                                                                                                        | 100.00%    |
|                             |                                                                              | Blood test                                                                                                                                                                                                                             | 100.00%    |
|                             |                                                                              | ECG                                                                                                                                                                                                                                    | 100.00%    |
| <b>Pre-BaS stage</b>        | Personnel time per visit (in mins)                                           | Surgeon                                                                                                                                                                                                                                | 30.00      |
|                             |                                                                              | Dietitian                                                                                                                                                                                                                              | 45.00      |
|                             |                                                                              | Anaesthetist                                                                                                                                                                                                                           | 30.00      |
| <b>Post-BaS follow-up</b>   | Follow-up visits (up to 24 months post-BaS)                                  | Nurse                                                                                                                                                                                                                                  | 4.00       |
|                             |                                                                              | Surgeon                                                                                                                                                                                                                                | 1.00       |
|                             |                                                                              | Dietitian                                                                                                                                                                                                                              | 3.00       |
|                             |                                                                              | GP                                                                                                                                                                                                                                     | 0.00       |
|                             | Follow-up visits (24 to 48 months post-BaS)                                  | Nurse                                                                                                                                                                                                                                  | 0.00       |
|                             |                                                                              | Surgeon                                                                                                                                                                                                                                | 0.00       |
|                             |                                                                              | Dietitian                                                                                                                                                                                                                              | 0.00       |
|                             |                                                                              | GP                                                                                                                                                                                                                                     | 4.00       |
|                             | Personnel time per visit (in mins)                                           | Nurse                                                                                                                                                                                                                                  | 10.00      |
|                             |                                                                              | Surgeon                                                                                                                                                                                                                                | 10.00      |
|                             |                                                                              | Dietitian                                                                                                                                                                                                                              | 10.00      |
|                             |                                                                              | GP                                                                                                                                                                                                                                     | 10.00      |
| <b>Resource utilisation</b> | Number of working hours per personnel (annual)                               | (GP, psychologist, dietitian, endocrinologist, physiotherapist, surgeon, anaesthetist, registrar surgery, registrar/trainee anaesthesiology, operating department practitioner, healthcare assistant/healthcare service worker, nurse) | 2160 each* |
|                             | Proportion of time spent on BaS (Current scenario)                           | (GP, psychologist, dietitian, endocrinologist, physiotherapist, surgeon, anaesthetist, registrar surgery, registrar/trainee anaesthesiology, operating department practitioner, healthcare assistant/healthcare service worker, nurse) | 50% each   |
|                             | Proportion of time spent on BaS for new personnel added in scale-up scenario | (GP, psychologist, dietitian, endocrinologist, physiotherapist, surgeon, anaesthetist, registrar surgery, registrar/trainee anaesthesiology, operating department practitioner, healthcare assistant/healthcare service worker, nurse) | 100% each  |

\*based on 48-hour work week for 45 weeks per year.  
BaS, bariatric surgery; ECG, electrocardiogram; GP, general physician; PMR, primary market research

Supplementary Table 2: Complication rates

| Short-term complications (30 days)                   |              |                    |                | Source |
|------------------------------------------------------|--------------|--------------------|----------------|--------|
| Complication rate (proportion of patient population) | Gastric band | Sleeve gastrectomy | Gastric bypass | (36)   |
| Bleed                                                | 0.00%        | 13.00%             | 18.90%         |        |
| Obstruction                                          | 0.00%        | 0.00%              | 8.70%          |        |
| Leak                                                 | 7.40%        | 0.00%              | 6.60%          |        |
| Revision surgery                                     | 2.20%        | 0.20%              | 1.30%          |        |
| Long-term complications                              |              |                    |                | (31)   |
| Complication rate (proportion of patient population) | Gastric band | Sleeve gastrectomy | Gastric bypass |        |
| Cholecystectomy, 1-year                              | 1.00%        | 0.00%              | 1.55%          |        |
| Cholecystectomy, 2-year                              | 0.00%        | 0.00%              | 1.93%          |        |
| Abdominal wall hernia operations, 1-year             | 0.50%        | 1.90%              | 0.88%          |        |
| Abdominal wall hernia operations, 2-year             | 3.10%        | 0.00%              | 1.22%          |        |
| Banding operations, 1-year                           | 0.00%        | 0.00%              | 3.60%          |        |
| Banding operations, 2-year                           | 0.00%        | 0.00%              | 7.10%          |        |
| Plastic operations, 1-year                           | 0.00%        | 0.00%              | 0.41%          |        |
| Plastic operations, 2-year                           | 0.80%        | 6.30%              | 5.04%          |        |
| Leakage and abscess, 1-year                          | 0.00%        | 0.19%              | 0.19%          |        |
| Leakage and abscess, 2-year                          | 0.00%        | 0.14%              | 0.14%          |        |
| Obstruction, 1-year                                  | 0.00%        | 1.74%              | 1.74%          |        |
| Obstruction, 2-year                                  | 0.00%        | 3.31%              | 3.31%          |        |
| Stricture, 1-year                                    | 0.00%        | 0.22%              | 0.22%          |        |
| Stricture, 2-year                                    | 0.00%        | 0.11%              | 0.11%          |        |
| Gastric ulcer, 1-year                                | 1.05%        | 1.05%              | 1.05%          |        |
| Gastric ulcer, 2-year                                | 0.95%        | 0.95%              | 0.95%          |        |
| Cholecystectomy 1-year, revision surgery             | 1.40%        | 1.40%              | 1.40%          |        |
| Cholecystectomy 2-year, revision surgery             | 0.70%        | 0.70%              | 0.70%          |        |
| Hernia operations 1-year, revision surgery           | 4.55%        | 4.55%              | 4.55%          |        |
| Hernia operations 2-year, revision surgery           | 5.18%        | 5.18%              | 5.18%          |        |
| Plastic operations 1-year, revision surgery          | 1.30%        | 1.30%              | 1.30%          |        |
| Plastic operations 2-year, revision surgery          | 3.40%        | 3.40%              | 3.40%          |        |
| Other complications 1-year, revision surgery         | 7.40%        | 7.40%              | 7.40%          |        |
| Other complications 2-year, revision surgery         | 5.50%        | 5.50%              | 5.50%          |        |

Supplementary Table 3: Healthcare resource utilisation

| Input                                                                                                                                                                                                                                                                                                               | Source                                                          |
|---------------------------------------------------------------------------------------------------------------------------------------------------------------------------------------------------------------------------------------------------------------------------------------------------------------------|-----------------------------------------------------------------|
| <b>Eligibility assessment stage*</b>                                                                                                                                                                                                                                                                                |                                                                 |
| Number of personnel visits                                                                                                                                                                                                                                                                                          | Expert inputs**, (31)                                           |
| Personnel time per visit (in mins)                                                                                                                                                                                                                                                                                  | Expert inputs**                                                 |
| Monitoring frequency (blood test, ECG)                                                                                                                                                                                                                                                                              | (31)                                                            |
| Proportion of population requiring personnel visits/monitoring                                                                                                                                                                                                                                                      | Expert inputs**, (31)                                           |
| <b>Pre-BaS stage*</b>                                                                                                                                                                                                                                                                                               |                                                                 |
| Number of personnel visits                                                                                                                                                                                                                                                                                          | (31)                                                            |
| Personnel time per visit (in mins)                                                                                                                                                                                                                                                                                  | Expert inputs**                                                 |
| Proportion of population requiring personnel                                                                                                                                                                                                                                                                        | (31)                                                            |
| <b>BaS procedure</b>                                                                                                                                                                                                                                                                                                |                                                                 |
| Time spent (in mins)—gastric band/sleeve gastrectomy/ gastric bypass (surgeon, registrar surgery, anaesthetist, registrar / trainee anaesthesiology, nurses, operating department practitioner, healthcare assistant/healthcare service worker, operation theatre)                                                  | (40)                                                            |
| Hospital stays (number of days) (gastric band, sleeve gastrectomy, gastric bypass)                                                                                                                                                                                                                                  | (31)                                                            |
| <b>Post-BaS follow-up*</b>                                                                                                                                                                                                                                                                                          |                                                                 |
| Follow-up visits (up to 24 months post-BaS, 24 to 48 months post-BaS)                                                                                                                                                                                                                                               | Expert inputs**, (31)                                           |
| Personnel time per visit (in mins)                                                                                                                                                                                                                                                                                  | Assumption, validated through PMR QoL interviews Mar 2023**     |
| <b>Resource utilisation</b>                                                                                                                                                                                                                                                                                         |                                                                 |
| Number of working hours per personnel (annual) (GP, psychologist, dietitian, endocrinologist, physiotherapist, surgeon, anaesthetist, registrar surgery, registrar/trainee anaesthesiology, operating department practitioner, healthcare assistant/healthcare service worker, nurse)                               | Assumption (based on 48–hour work week for 45 weeks per year)** |
| Proportion of time spent on BaS (current scenario) (GP, psychologist, dietitian, endocrinologist, physiotherapist, surgeon, anaesthetist, registrar surgery, registrar/trainee anaesthesiology, operating department practitioner, healthcare assistant/healthcare service worker, nurse)                           | Assumption**                                                    |
| Proportion of time spent on BaS for new personnel added in scale-up scenario (GP, psychologist, dietitian, endocrinologist, physiotherapist, surgeon, anaesthetist, registrar surgery, registrar/trainee anaesthesiology, operating department practitioner, healthcare assistant/healthcare service worker, nurse) | Assumption**                                                    |

\*Refer to Figure 1 for information on the personnel involved.

\*\*Data from PMR report are described in Supplementary Table 1.

BaS, bariatric surgery; ECG, electrocardiogram; GP, general physician; PMR, primary market research

**Supplementary Table 4: Base-case results for scenario of maximising current NHS capacity**

|                                             | <b>Current scenario</b> | <b>Projected scenario</b> | <b>Incremental</b>  |
|---------------------------------------------|-------------------------|---------------------------|---------------------|
| <b>Number of BaS procedures (n)</b>         |                         |                           |                     |
| Gastric band                                | 15,889                  | 4,915                     | -10,974             |
| Sleeve gastrectomy                          | 72,949                  | 78,707                    | 5,758               |
| Gastric bypass                              | 48,909                  | 71,271                    | 22,362              |
| <b>Total</b>                                | <b>137,746</b>          | <b>154,893</b>            | <b>17,147</b>       |
| Revision surgery–Gastric band               | 406                     | 126                       | -280                |
| Revision surgery–Sleeve gastrectomy         | 719                     | 776                       | 57                  |
| Revision surgery–Gastric bypass             | 1,349                   | 1,965                     | 617                 |
| <b>Total</b>                                | <b>2,474</b>            | <b>2,867</b>              | <b>393</b>          |
| <b>Cost breakdown</b>                       |                         |                           |                     |
| <b>Infrastructure costs of BaS scale-up</b> | £0                      | £0                        | £0                  |
| <b>Procedure costs</b>                      | £1,309,959,040          | £1,548,177,028            | £238,217,988        |
| Gastric band                                | £83,421,834             | £25,804,911               | -£57,616,922        |
| Sleeve gastrectomy                          | £700,438,431            | £755,730,103              | £55,291,672         |
| Gastric bypass                              | £526,098,776            | £766,642,014              | £240,543,238        |
| Revision surgery–Gastric band               | £295,652                | £91,454                   | -£204,198           |
| Revision surgery–Sleeve gastrectomy         | £3,010,012              | £3,247,618                | £237,606            |
| Revision surgery–Gastric bypass             | £3,741,914              | £5,452,794                | £1,710,880          |
| Revision surgery costs                      | £7,047,578              | £8,791,867                | £1,744,289          |
| <b>Personnel costs–Post-BaS follow-up</b>   | <b>£27,195,369</b>      | <b>£30,581,267</b>        | <b>£3,385,898</b>   |
| <b>Complication costs</b>                   | £66,810,472             | £86,349,765               | £19,539,294         |
| Gastric band                                | £4,330,778              | £1,339,642                | -£2,991,137         |
| Sleeve gastrectomy                          | £15,957,875             | £17,217,568               | £1,259,693          |
| Gastric bypass                              | £46,521,818             | £67,792,555               | £21,270,737         |
| <b>Total–20 years</b>                       | <b>£1,411,012,459</b>   | <b>£1,673,899,928</b>     | <b>£262,887,469</b> |
| <b>Total–Annual</b>                         | <b>£70,550,623</b>      | <b>£83,694,996</b>        | <b>£13,144,373</b>  |

BaS, bariatric surgery

**Supplementary Table 5: Base-case results for scenario of maximising current NHS and private sector capacity**

|                                             | Current scenario | Projected scenario | Incremental    |
|---------------------------------------------|------------------|--------------------|----------------|
| <b>Number of BaS procedures (n)</b>         |                  |                    |                |
| Gastric band                                | 15,889           | 7,251              | -8,637         |
| Sleeve gastrectomy                          | 72,949           | 116,125            | 43,176         |
| Gastric bypass                              | 48,909           | 105,154            | 56,245         |
| <b>Total</b>                                | <b>137,746</b>   | <b>228,531</b>     | <b>90,784</b>  |
| Revision surgery - Gastric band             | 406              | 185                | -221           |
| Revision surgery - Sleeve gastrectomy       | 719              | 1,145              | 426            |
| Revision surgery - Gastric bypass           | 1,349            | 2,899              | 1,551          |
| <b>Total</b>                                | <b>2,474</b>     | <b>4,229</b>       | <b>1,756</b>   |
| <b>Cost breakdown</b>                       |                  |                    |                |
| <b>Infrastructure costs of BaS scale-up</b> | £0               | £0                 | £0             |
| <b>Procedure costs</b>                      | £1,309,959,040   | £2,284,189,181     | £974,230,140   |
| Gastric band                                | £83,421,834      | £38,072,713        | £-45,349,121   |
| Sleeve gastrectomy                          | £700,438,431     | £1,115,008,486     | £414,570,055   |
| Gastric bypass                              | £526,098,776     | £1,131,107,982     | £605,009,206   |
| Revision surgery–Gastric band               | £295,652         | £134,932           | £-160,720      |
| Revision surgery–Sleeve gastrectomy         | £3,010,012       | £4,791,554         | £1,781,543     |
| Revision surgery–Gastric bypass             | £3,741,914       | £8,045,084         | £4,303,170     |
| Revision surgery costs                      | £7,047,578       | £12,971,570        | £5,923,992     |
| <b>Personnel costs–Post-BaS follow-up</b>   | £27,195,369      | £45,119,775        | £17,924,406    |
| <b>Complication costs</b>                   | £66,810,472      | £127,400,934       | £60,590,462    |
| Gastric band                                | £4,330,778       | £1,976,515         | £-2,354,264    |
| Sleeve gastrectomy                          | £15,957,875      | £25,402,898        | £9,445,023     |
| Gastric bypass                              | £46,521,818      | £100,021,521       | £53,499,703    |
| <b>Total–20 years</b>                       | £1,411,012,459   | £2,469,681,460     | £1,058,669,001 |
| <b>Total–Annual</b>                         | £70,550,623      | £123,484,073       | £52,933,450    |

BaS, bariatric surgery

**Supplementary Table 6: Base-case results for scenario of maximising current NHS capacity and adding the infrastructure**

|                                     | Current scenario | Projected scenario | Incremental |
|-------------------------------------|------------------|--------------------|-------------|
| <b>Number of BaS procedures (n)</b> |                  |                    |             |
| Gastric band                        | 15,889           | 12,603             | -3,286      |
| Sleeve gastrectomy                  | 72,949           | 280,477            | 207,528     |
| Gastric bypass                      | 48,909           | 261,408            | 212,499     |

|                                                |                       |                       |                       |
|------------------------------------------------|-----------------------|-----------------------|-----------------------|
| <b>Total</b>                                   | <b>137,746</b>        | <b>554,489</b>        | <b>416,742</b>        |
| Revision surgery–Gastric band                  | 406                   | 322                   | -84                   |
| Revision surgery–Sleeve gastrectomy            | 719                   | 2,765                 | 2,046                 |
| Revision surgery–Gastric bypass                | 1,349                 | 7,207                 | 5,859                 |
| <b>Total</b>                                   | <b>2,474</b>          | <b>10,295</b>         | <b>7,821</b>          |
| <b>Cost breakdown</b>                          |                       |                       |                       |
| <b>Infrastructure costs of BaS scale-up</b>    | <b>£0</b>             | <b>£362,500,000</b>   | <b>£362,500,000</b>   |
| <b>Procedure costs</b>                         | <b>£1,309,959,040</b> | <b>£5,571,136,652</b> | <b>£4,261,177,612</b> |
| Gastric band                                   | £83,421,834           | £66,171,160           | -£17,250,674          |
| Sleeve gastrectomy                             | £700,438,431          | £2,693,074,993        | £1,992,636,562        |
| Gastric bypass                                 | £526,098,776          | £2,811,890,500        | £2,285,791,723        |
| Revision surgery–Gastric band                  | £295,652              | £234,514              | -£61,137              |
| Revision surgery–Sleeve gastrectomy            | £3,010,012            | £11,573,020           | £8,563,008            |
| Revision surgery–Gastric bypass                | £3,741,914            | £19,999,766           | £16,257,852           |
| Revision surgery costs                         | £7,047,578            | £31,807,300           | £24,759,722           |
| <b>Personnel costs–Post-BaS follow-up</b>      | <b>£27,195,369</b>    | <b>£108,792,968</b>   | <b>£81,597,599</b>    |
| <b>Complication costs</b>                      | <b>£66,810,472</b>    | <b>£313,440,345</b>   | <b>£246,629,873</b>   |
| Gastric band                                   | £4,330,778            | £3,435,223            | -£895,555             |
| Sleeve gastrectomy                             | £15,957,875           | £61,355,506           | £45,397,631           |
| Gastric bypass                                 | £46,521,818           | £248,649,616          | £202,127,798          |
| <b>Total–20 years</b>                          | <b>£1,411,012,459</b> | <b>£6,387,677,265</b> | <b>£4,976,664,806</b> |
| <b>Total–Annual</b>                            | <b>£70,550,623</b>    | <b>£319,383,863</b>   | <b>£248,833,240</b>   |
| <b>Number of personnel required</b>            |                       |                       |                       |
| GP                                             | 139                   | 337                   | 198                   |
| Mental health professional                     | 192                   | 469                   | 277                   |
| Dietitian                                      | 222                   | 544                   | 322                   |
| Endocrinologist                                | 52                    | 126                   | 74                    |
| Physiotherapist                                | 96                    | 235                   | 139                   |
| Surgeon                                        | 265                   | 668                   | 403                   |
| Anaesthetist                                   | 275                   | 693                   | 418                   |
| Registrar surgery                              | 192                   | 494                   | 302                   |
| Registrar/Trainee anaesthesiology              | 197                   | 523                   | 326                   |
| Operating department practitioner              | 218                   | 552                   | 334                   |
| Healthcare assistant/Healthcare service worker | 371                   | 953                   | 582                   |
| Nurse                                          | 464                   | 1170                  | 706                   |
| <b>Total</b>                                   | <b>2683</b>           | <b>6764</b>           | <b>4081</b>           |

BaS, bariatric surgery, GP, general physician

**Supplementary Figure 1: Cost versus capacity over time for the three strategies**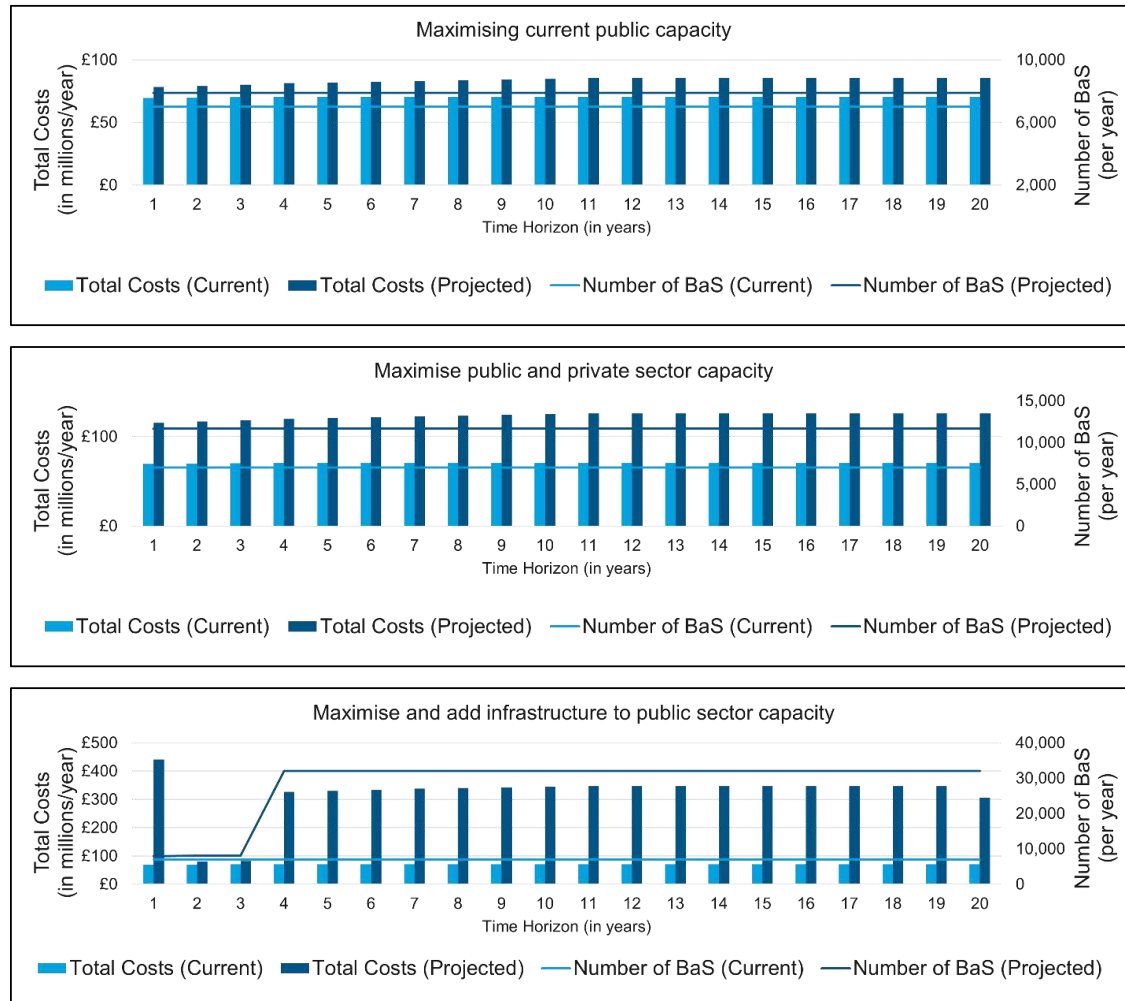

BaS, bariatric surgery



**Supplementary Figure 2: BaS Backlog (number of BaS needed including revision surgeries) for the three strategies**

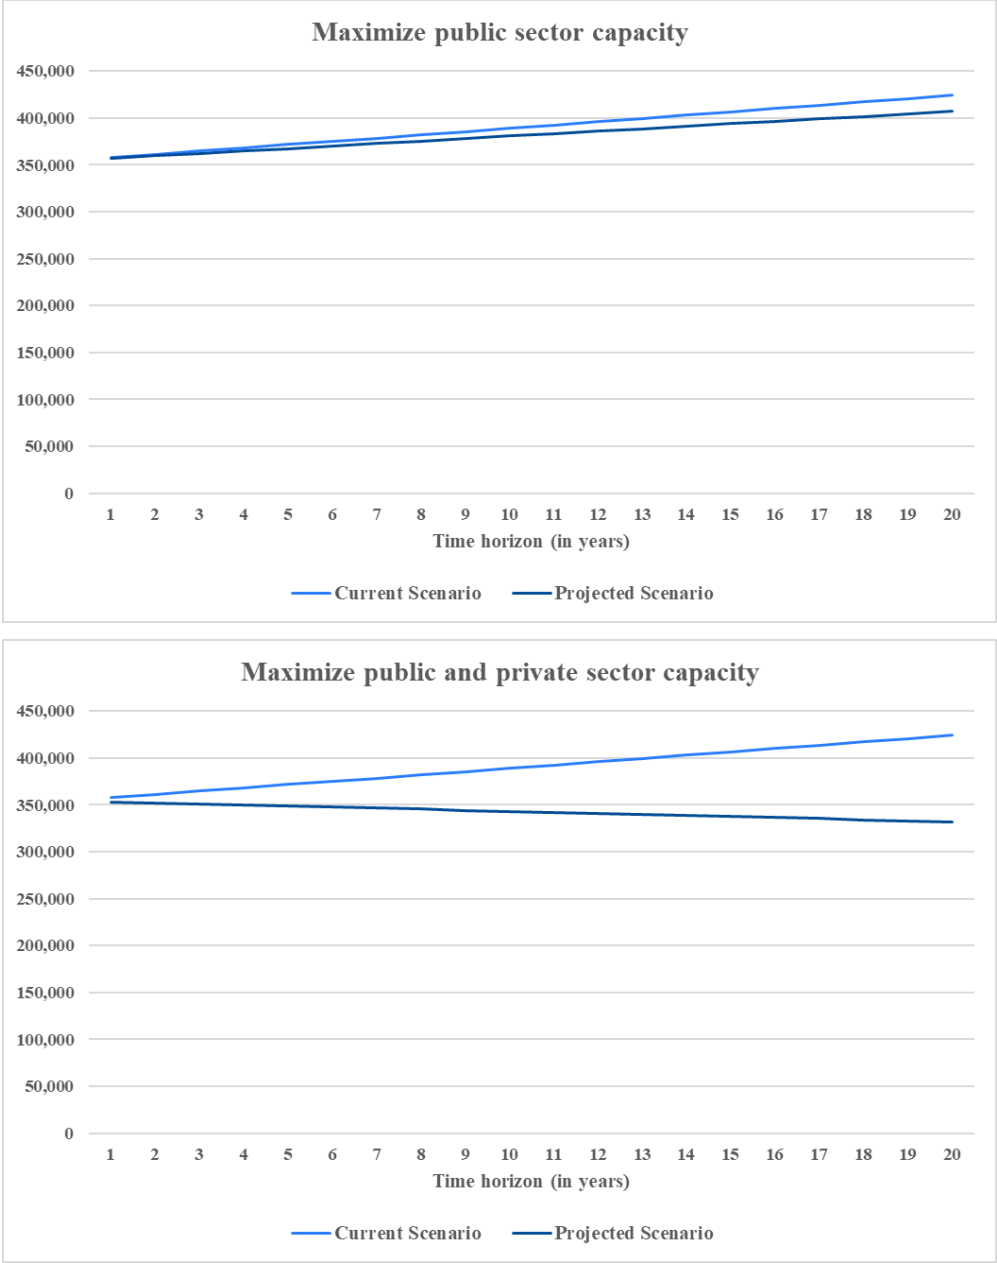

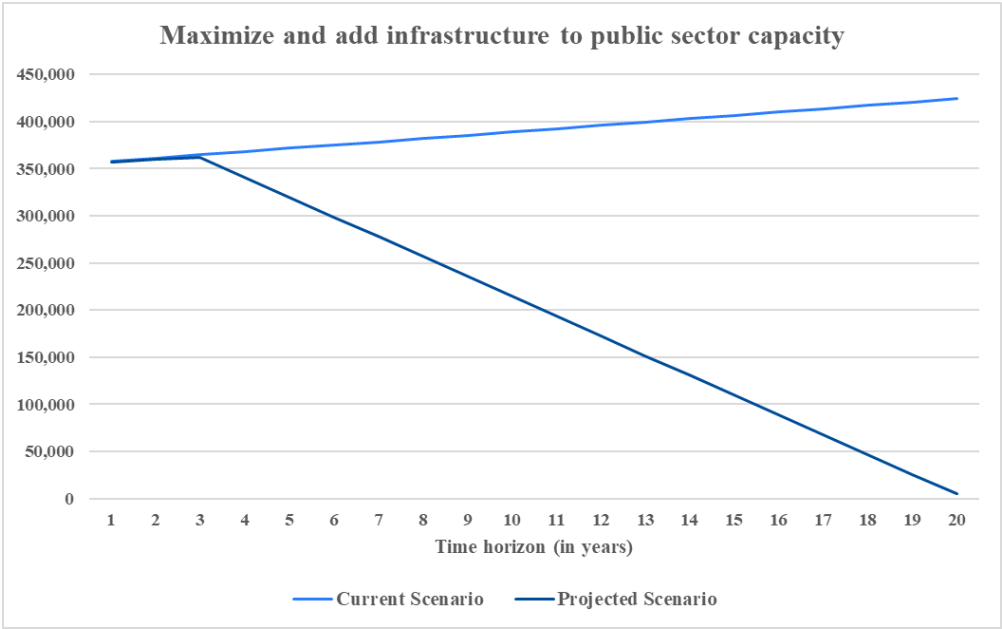

Supplementary Figure 3: One-way sensitivity analysis

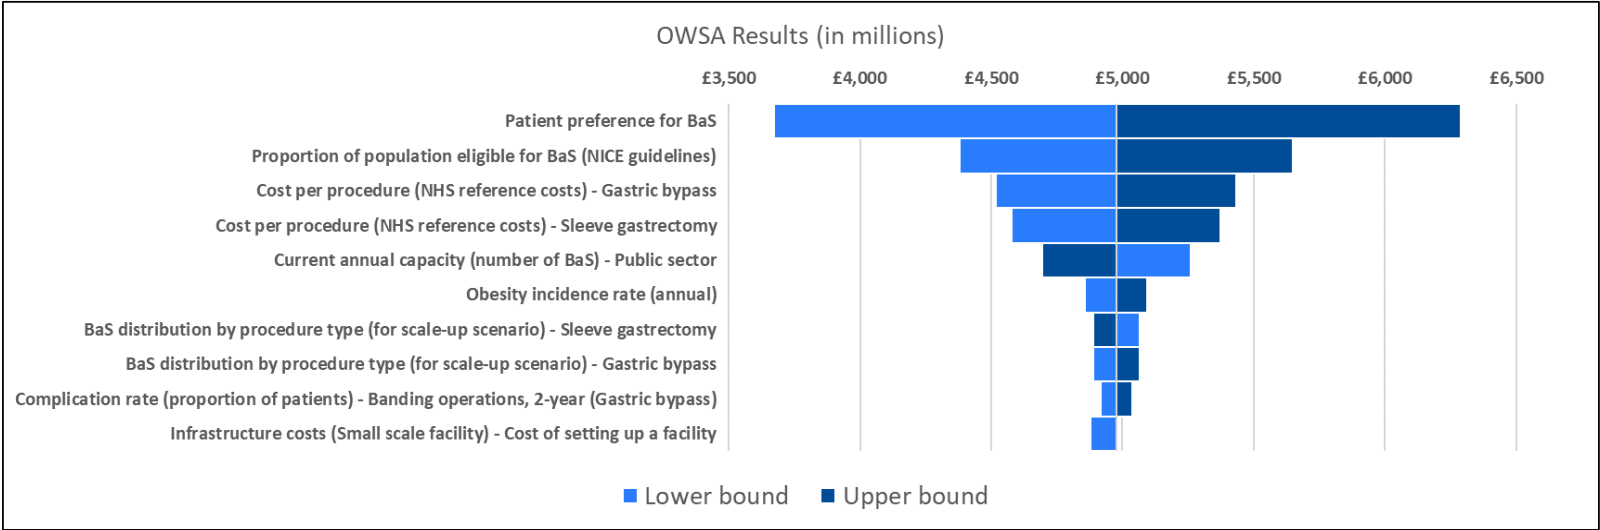

BaS, bariatric surgery; NHS, National Health Service; NICE, National Institute for Health and Care Excellence; OWSA, one-way sensitivity analysis

## Supplementary Text 1: Scenario Analysis

Scenarios were also assessed for below mentioned assumptions, maintaining all the other base-case settings.

### *Scenario 1: Proportion of eligible population who would receive BaS*

In this scenario analysis, we modified only the proportion of the eligible population in the base-case settings (assumed as 10%) for strategy 3.

#### *5% of eligible population who receive BaS over a 20-year time horizon*

Over a 20-year time horizon, the prevalent target population size was estimated at 173,943, and the annual incident target population size was estimated at 5,163. The number of BaS procedures (including revision surgery) was projected to increase from 140,220 to 282,371 (revision surgeries: 5,140; incremental: 14,172 BaS). The total annual and 20-year costs were projected to increase to £156.0 million and £3.1 billion, respectively. Scaling up would require an additional full-time 1,251 personnel and 16 new facilities (1 small scale, 15 large scale) dedicated to BaS.

#### *25% of eligible population who receive BaS over a 20-year time horizon*

Over a 20-year time horizon, the prevalent target population size was estimated at 869,714, and the annual incident target population size was estimated at 25,815. The number of BaS procedures (including revision surgery) was projected to increase from 140,220 to 1,411,958 (revision surgeries: 25,756; incremental: 1,271,738 BaS). The total annual and 20-year costs were projected to increase to £809.7 million and £16.2 billion, respectively. Scaling up would require an additional full-time 12,576 personnel and 149 new facilities (1 small scale, 148 large scale) dedicated to BaS.

Since the reported prevalence of Type 2 diabetes among BaS eligible patients in the UK ranges from 27% to 31%, this scenario can be interpreted as representing targeting patients with diabetes (39, 40). However, it is important to note that this scenario doesn't capture any additional costs for BaS management that may be specific to patients with diabetes.

*100% of eligible population who receive BaS over a 20-year time horizon*

Over a 20-year time horizon, the prevalent target population size was estimated at 3,478,854, and the annual incident target population size was estimated at 103,261. The number of BaS procedures (including revision surgery) was projected to increase from 140,220 to 5,647,832 (revision surgeries: 103,065; incremental: 5,507,613 BaS). The total annual and 20-year costs were projected to increase to £3.3 billion and £65.2 billion, respectively. Scaling up would require 55,042 full-time additional personnel and 647 new facilities (1 small scale, 646 large scale) dedicated to BaS.

*Scenario 2: Distribution of BaS by type of procedure over 20-year time horizon*

In this scenario, the time to achieve 100% distribution of gastric bypass was 10 years, while other base-case settings remain the same.

*Gastric bypass at 100%*

Over a 20-year time horizon, the number of BaS (including revision surgery) procedures was projected to increase from 140,220 to 569,693 (incremental: 429,473 BaS). The number of gastric bypass, sleeve gastrectomy and gastric band operations was projected to be 484,346, 58,378 and 12,715, respectively. The total annual and 20-years costs were projected to increase to £341.7 million and £6.8 billion, respectively. Scaling up using this scenario would require only 4,518 additional full-time personnel dedicated to BaS over 20 years.

50% of new staff capacity is focused on BaS and it takes 1 year for a facility to be fully functional from the time it's built

Over a 20-year time horizon, the number of BaS procedures (including revision surgery) was projected to increase from 140,220 to 564,783 (incremental: 424,563 BaS). The total annual cost and total 20-year cost were projected to increase to £249.8 million and £5.0 billion, respectively. Scaling up using this scenario would require only 8,177 additional full-time personnel dedicated to BaS.

*Scenario 3: Eligible population with BMI  $\geq 40$  kg/m<sup>2</sup>*

Over a 20-year time horizon, with 10% of the eligible population receiving BaS, the prevalent and annual incident target population sizes were estimated at 149,500 and 4,033, respectively and the number of BaS procedures (including revision surgery) was projected to increase from 140,220 to 234,474 (revision surgeries: 4,266; incremental: 94,254). The total annual cost was projected to increase from £70.6 million to £119.6 million. The overall total cost was projected to increase from £1.4 billion to £2.4 billion over 20 years. BaS scale-up would require an additional full-time 681 personnel dedicated to BaS.

*Scenario 4: Time horizon*

Time horizon of 10 years

This scenario considered the current eligible population but only added new eligible population for 10 years. Over a 10-year time horizon, with 10% eligible population receiving BaS, prevalent and annual incident target population sizes were the same as in the base-case. The number of BaS procedures (including revision surgery) was projected to increase from 70,110 to 459,590 (incremental: 389,480 BaS). The total annual cost and total ten-year cost were projected to

increase to £563.0 million and £5.6 billion, respectively. Scaling up using this scenario would require only 3,730 additional full-time personnel dedicated to BaS.

.

*Scenario 5: Increased incident rate of obesity (sourced from Cancer Research UK, 2022 (41), estimated based on projected change between 2019 and 2040 for England, i.e. mean of obesity and severe obesity)*

Over a 20-year time horizon, with 10% of the eligible population receiving BaS, after increasing the annual incident rate to 3.33%, the prevalent target population size was estimated at 3,478,854, and the annual incident target population size was estimated at 115,846. The number of BaS (including revision surgery) was projected to increase from 140,220 to 590,424 (revision surgeries: 10,763; incremental: 450,204 BaS). The total annual cost and total 20-year cost were projected to increase to £334.2 million and £6.7 billion, respectively.
